# Supplementary material
Source: Elsevier journal article supplement (https://www.sciencedirect.com/science/article/pii/S0121812319300751)
Supplement: mmc1 [file S0121812319300751:mmc1.pdf]

| ANEXO 1. TEST DE EVALUACIÓN FUNCIONAL DE OSWESTRY                                                                                                                                                                                                                                                                                                                                                                                                                                     |                                                                                                                                                                                  |
|---------------------------------------------------------------------------------------------------------------------------------------------------------------------------------------------------------------------------------------------------------------------------------------------------------------------------------------------------------------------------------------------------------------------------------------------------------------------------------------|----------------------------------------------------------------------------------------------------------------------------------------------------------------------------------|
| ÍTEM                                                                                                                                                                                                                                                                                                                                                                                                                                                                                  | PUNTUACIÓN                                                                                                                                                                       |
| <b>1.-Intensidad del dolor:</b> <ul style="list-style-type: none"> <li>- Actualmente no tengo dolor ni de columna ni de pierna</li> <li>- Mi dolor de columna o pierna es muy leve en este momento</li> <li>- Mi dolor de columna o pierna es moderado en este momento</li> <li>- Mi dolor de columna o pierna es intenso en este momento</li> <li>- Mi dolor de columna o pierna es muy intenso en este momento</li> <li>- Mi dolor es el peor imaginable en este momento</li> </ul> | <input type="checkbox"/> 0<br><input type="checkbox"/> 1<br><input type="checkbox"/> 2<br><input type="checkbox"/> 3<br><input type="checkbox"/> 4<br><input type="checkbox"/> 5 |
| <b>2.-Actividades de la vida cotidiana (lavarse, vestirse, etc.):</b> <ul style="list-style-type: none"> <li>- Las hago sin ningún dolor</li> <li>- Puedo hacer de todo solo y en forma normal, pero con dolor</li> <li>- Las hago en forma más lenta y cuidadosa por el dolor</li> <li>- Ocasionalmente requiero ayuda</li> <li>- Requiero ayuda a diario</li> <li>- Necesito ayuda para todo, estoy en cama</li> </ul>                                                              | <input type="checkbox"/> 0<br><input type="checkbox"/> 1<br><input type="checkbox"/> 2<br><input type="checkbox"/> 3<br><input type="checkbox"/> 4<br><input type="checkbox"/> 5 |
| <b>3.- Levantar objetos:</b> <ul style="list-style-type: none"> <li>- Puedo levantar objetos pesados desde el suelo sin dolor</li> <li>- Puedo levantar objetos pesados desde el suelo pero con dolor</li> <li>- No puedo levantar objetos pesados desde el suelo debido al dolor, pero si cargar un objeto pesado desde una mayor altura, ej. desde una mesa</li> </ul>                                                                                                              | <input type="checkbox"/> 0<br><input type="checkbox"/> 1<br><input type="checkbox"/> 2<br><input type="checkbox"/> 3<br><input type="checkbox"/> 4<br><input type="checkbox"/> 5 |

|                                                                                                                                                                                                                                                                                                                                                                                                                                                                                   |                                                                                                                                                                                  |
|-----------------------------------------------------------------------------------------------------------------------------------------------------------------------------------------------------------------------------------------------------------------------------------------------------------------------------------------------------------------------------------------------------------------------------------------------------------------------------------|----------------------------------------------------------------------------------------------------------------------------------------------------------------------------------|
| <ul style="list-style-type: none"> <li>- Solo puedo levantar desde el suelo objetos de peso mediano</li> <li>- Solo puedo levantar desde el suelo cosas muy ligeras</li> <li>- No puedo levantar ni cargar nada</li> </ul>                                                                                                                                                                                                                                                        |                                                                                                                                                                                  |
| <b>4.- Caminar:</b> <ul style="list-style-type: none"> <li>- Camino todo lo que quiero sin dolor</li> <li>- No puedo caminar más de 1-2 km debido al dolor</li> <li>- No puedo caminar más de 500-1000 m debido al dolor</li> <li>- Solo puedo caminar apoyado por uno o dos bastones</li> <li>- Estoy prácticamente en cama, me cuesta mucho hasta ir al baño</li> </ul>                                                                                                         | <input type="checkbox"/> 0<br><input type="checkbox"/> 1<br><input type="checkbox"/> 2<br><input type="checkbox"/> 3<br><input type="checkbox"/> 4<br><input type="checkbox"/> 5 |
| <b>5.- Sentarse:</b> <ul style="list-style-type: none"> <li>- Me puedo sentar en cualquier silla todo el rato que quiera sin dolor</li> <li>- Solo en un asiento especial puedo sentarme sin dolor</li> <li>- No puedo estar sentado más de una hora sin dolor</li> <li>- No puedo estar sentado más de 30 minutos sin dolor</li> <li>- No puedo estar sentado más de 10 minutos sin dolor</li> <li>- No puedo permanecer ningún instante sentado sin que sienta dolor</li> </ul> | <input type="checkbox"/> 0<br><input type="checkbox"/> 1<br><input type="checkbox"/> 2<br><input type="checkbox"/> 3<br><input type="checkbox"/> 4<br><input type="checkbox"/> 5 |
| <b>6.- Pararse:</b> <ul style="list-style-type: none"> <li>- Puedo permanecer de pie lo que quiero sin dolor</li> <li>- Puedo permanecer de pie lo que quiero, pero con dolor</li> <li>- No puedo estar más de una hora parado libre de dolor</li> <li>- No puedo estar parado más de 30 minutos sin dolor</li> <li>- No puedo estar parado más de 10 minutos sin dolor</li> <li>- No puedo permanecer ningún instante de pie sin dolor</li> </ul>                                | <input type="checkbox"/> 0<br><input type="checkbox"/> 1<br><input type="checkbox"/> 2<br><input type="checkbox"/> 3<br><input type="checkbox"/> 4<br><input type="checkbox"/> 5 |
| <b>7.- Dormir:</b> <ul style="list-style-type: none"> <li>- Puedo dormir bien, libre de dolor</li> </ul>                                                                                                                                                                                                                                                                                                                                                                          | <input type="checkbox"/> 0<br><input type="checkbox"/> 1                                                                                                                         |

|                                                                                                                                                                                                                                                                                                                                                                                                                                                    |                                                                                                                                                                                  |
|----------------------------------------------------------------------------------------------------------------------------------------------------------------------------------------------------------------------------------------------------------------------------------------------------------------------------------------------------------------------------------------------------------------------------------------------------|----------------------------------------------------------------------------------------------------------------------------------------------------------------------------------|
| <ul style="list-style-type: none"> <li>- Ocasionalmente el dolor me altera el sueño</li> <li>- Por el dolor no logro dormir más de 6 horas seguidas</li> <li>- Por el dolor no logro dormir más de 4 horas seguidas</li> <li>- Por el dolor no logro dormir más de 2 horas seguidas</li> <li>- No puedo dormir nada sin dolor</li> </ul>                                                                                                           | <input type="checkbox"/> 2<br><input type="checkbox"/> 3<br><input type="checkbox"/> 4<br><input type="checkbox"/> 5                                                             |
| <b>8.-Actividad sexual:</b> <ul style="list-style-type: none"> <li>- Normal, sin dolor de columna</li> <li>- Normal, aunque con dolor ocasional de columna</li> <li>- Casi normal, pero con importante dolor de columna</li> <li>- Seriamente limitada por el dolor de columna</li> <li>- Casi sin actividad por el dolor de columna</li> <li>- Sin actividad, debido a los dolores de columna</li> </ul>                                          | <input type="checkbox"/> 0<br><input type="checkbox"/> 1<br><input type="checkbox"/> 2<br><input type="checkbox"/> 3<br><input type="checkbox"/> 4<br><input type="checkbox"/> 5 |
| <b>9.-Actividades sociales (fiestas, deportes, etc.):</b> <ul style="list-style-type: none"> <li>- Sin restricciones, libres de dolor</li> <li>- Mi actividad es normal, pero aumenta el dolor</li> <li>- Mi dolor tiene poco impacto en mi actividad social, excepto aquellas más enérgicas (ej. deportes)</li> <li>- Debido al dolor salgo muy poco</li> <li>- Debido al dolor no salgo nunca</li> <li>- No hago nada debido al dolor</li> </ul> | <input type="checkbox"/> 0<br><input type="checkbox"/> 1<br><input type="checkbox"/> 2<br><input type="checkbox"/> 3<br><input type="checkbox"/> 4<br><input type="checkbox"/> 5 |
| <b>10.-Viajar:</b> <ul style="list-style-type: none"> <li>- Sin problemas, libre de dolor</li> <li>- Sin problemas, pero me produce dolor</li> <li>- El dolor es severo, pero logro viajes de hasta 2 horas</li> <li>- Puedo viajar menos de 1 hora por el dolor</li> <li>- Puedo viajar menos de 30 minutos por el dolor</li> <li>- Solo viajo para ir al médico o al hospital</li> </ul>                                                         | <input type="checkbox"/> 0<br><input type="checkbox"/> 1<br><input type="checkbox"/> 2<br><input type="checkbox"/> 3<br><input type="checkbox"/> 4<br><input type="checkbox"/> 5 |

Modificado de: Flórez García MT et al. Adaptación transcultural a la población española de la escala de incapacidad por dolor lumbar de Oswestry. *Rehabilitación (Madr)*. 1995;29:138-45.
